# Supplementary material for: Electrochemical reduction of carbon dioxide to acetic acid on a Cu–Au modified boron-doped diamond electrode with a flow-cell system
Source: Royal Society of Chemistry journal article supplement (doi:10.1039/d3ra03836j), 2023-01-01
Supplement: d3ra03836j1.pdf [file d3ra03836j1.pdf]

## SUPPORTING INFORMATION

### Electrochemical reduction of carbon dioxide to acetic acid on Cu-Au modified boron-doped diamond electrode in a flow-cell system

Millati H. Saprudin,<sup>a</sup> Prastika K Jiwanti,<sup>b</sup> Deden Saprudin,<sup>c</sup> Afiten R. Sanjaya,<sup>a</sup> Yulia M. T. A. Putri,<sup>a</sup> Yasuaki Einaga,<sup>d</sup> and Tribidasari A. Ivandini<sup>\*a</sup>

<sup>a</sup>Department of Chemistry, Faculty of Mathematics and Natural Sciences, Universitas Indonesia, Kampus UI Depok, Jakarta 16424, Indonesia.

<sup>b</sup>Nanotechnology Engineering, Faculty of Advanced Technology and Multidiscipline, Universitas Airlangga, Surabaya 60115, Indonesia.

<sup>c</sup>Department of Chemistry, Faculty of Mathematics and Natural Sciences, IPB University, Jl. Tanjung Kampus IPB Dramaga, Bogor 16680, Indonesia

<sup>d</sup>Department of Chemistry, Faculty of Science and Technology, Keio University, Yokohama 223-8522, Japan

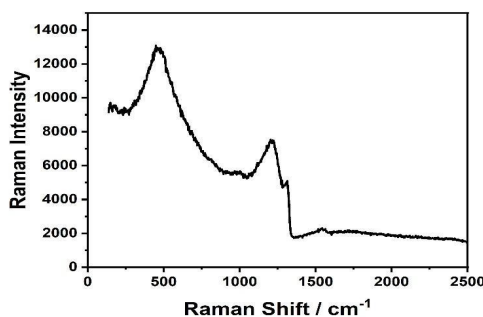

**Figure S1.** Raman spectra of the unmodified boron-doped diamond film prepared by using MPACVD.

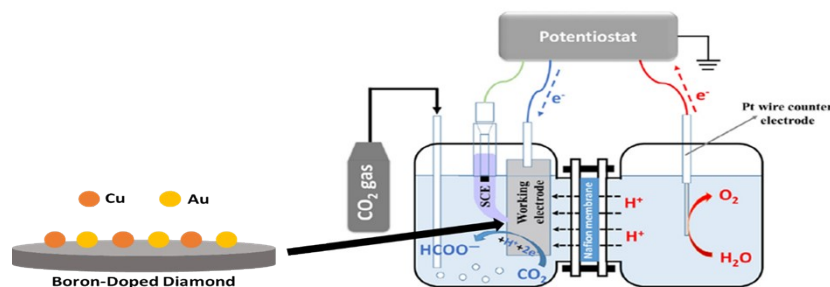

**Figure S2.** Schematic Diagram of the CO<sub>2</sub> electro-reduction device used in this work

## SUPPORTING INFORMATION

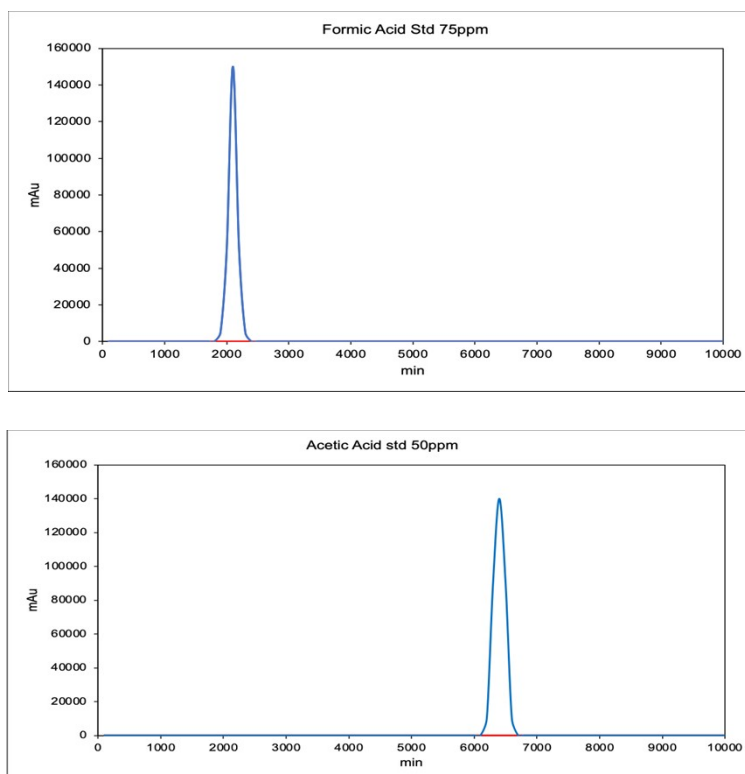

**Figure S3.** The standard chromatogram of acetic acid (75 ppm) and formic acid (50 ppm) with inertsil ODS-3 (5  $\mu\text{m}$ , GL Science) used as the column and 0.1%  $\text{HClO}_4$  as the mobile phase

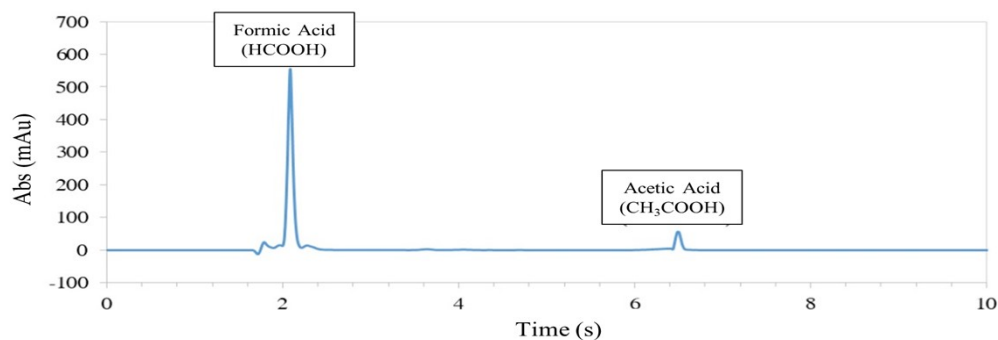

**Figure S4.** Chromatogram of  $\text{CO}_2$  electroreduction products using CuAu-BDD electrodes at an applied potential of  $-1.0$  V (vs Ag/AgCl) for 1 hour. The column was Inertsil ODS-3 (5  $\mu\text{m}$ , GL Science) with 0.1%  $\text{HClO}_4$  as the mobile phase

## SUPPORTING INFORMATION

### Cu-BDD

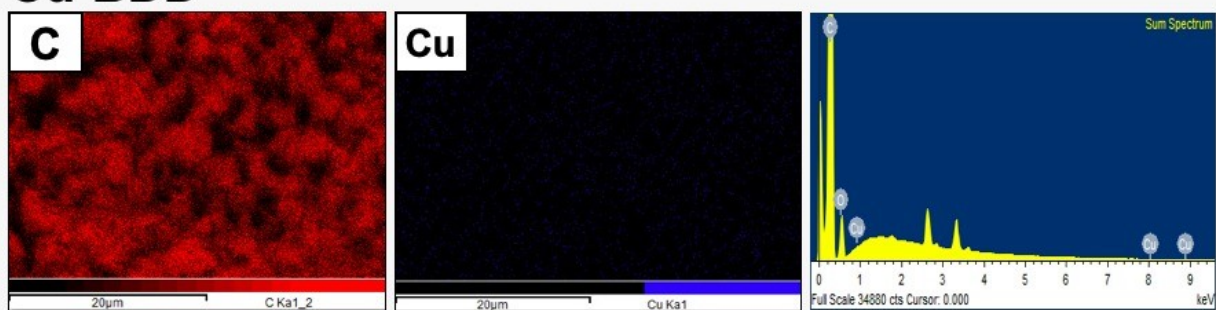

### Au-BDD

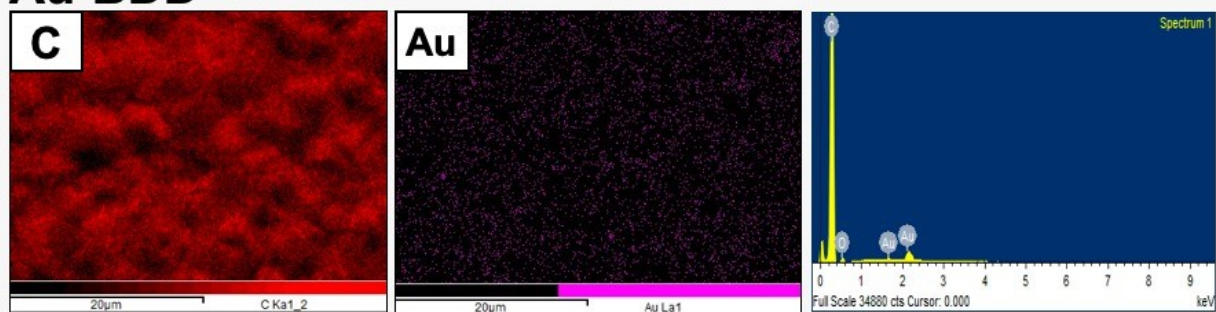

### CuAu-BDD

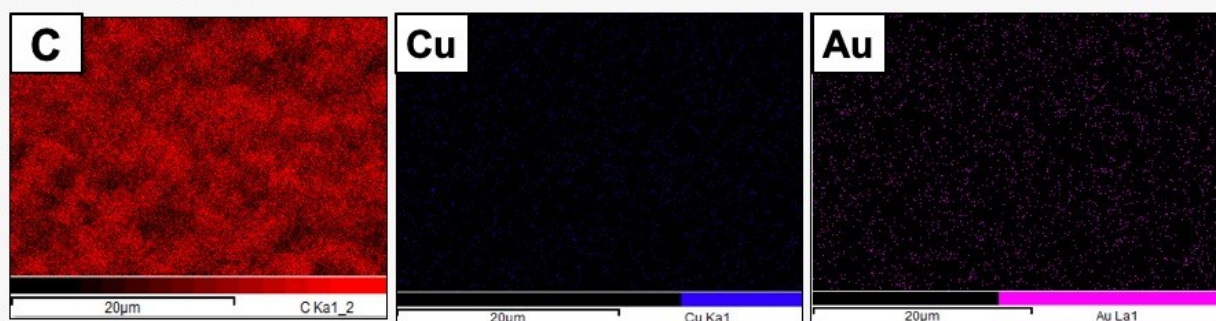

Figure S5. EDS mapping of C, Cu, Au for Cu-, Au-, and CuAu-BDD
